# Supplementary material for: The Effect of Adjuvant Chemotherapy on Localized Extraskeletal Osteosarcoma: A Systematic Review
Source: MDPI journal article supplement (doi:10.3390/cancers14102559), 2022-05-23
Supplement: s1 [file s1]

# The Effect of Adjuvant Chemotherapy on Localized Extraskeletal Osteosarcoma: A Systematic Review

Shinji Tsukamoto <sup>1</sup>, Andreas F. Mavrogenis <sup>2,\*</sup>, Lucia Angelelli <sup>3</sup>, Alberto Righi <sup>4</sup>, Giuseppe Filardo <sup>3</sup>, Akira Kido <sup>5</sup>, Kanya Honoki <sup>1</sup>, Yuu Tanaka <sup>6</sup>, Yasuhito Tanaka <sup>1</sup> and Costantino Errani <sup>7</sup>

**Table S1.** Literature search and study selection. (Supplementary material).

| <b>PubMed</b>  |                                                                                                                                                                                                                 | 2022/3/26 |
|----------------|-----------------------------------------------------------------------------------------------------------------------------------------------------------------------------------------------------------------|-----------|
| #              | Searched for                                                                                                                                                                                                    | Results   |
| 1              | Extraskeletal osteosarcoma *[tiab] OR extraosseous osteosarcoma *[tiab] OR soft tissue osteosarcoma *[tiab] OR extra-skeletal osteosarcoma *[tiab] OR extra-osseous osteosarcoma *[tiab]                        | 458       |
| <b>Embase</b>  |                                                                                                                                                                                                                 | 2022/3/26 |
| Set#           | Searched for                                                                                                                                                                                                    | Results   |
| S1             | (TI,AB((extraskeletal* OR extraosseous* OR (soft P/0 tissue*) OR “extra-skeletal” OR “extra-osseous”) P/0 osteosarcoma*))                                                                                       | 546°      |
| <b>Central</b> |                                                                                                                                                                                                                 | 2022/3/26 |
| ID             | Searched for                                                                                                                                                                                                    | Results   |
| #1             | ((extraskeletal* NEXT osteosarcoma*) OR (extraosseous* NEXT osteosarcoma*) OR (soft NEXT tissue* NEXT osteosarcoma*) OR (“extra-skeletal” NEXT osteosarcoma*) OR (“extra-osseous” NEXT osteosarcoma*)):ti,ab,kw | 1         |
